# Supplementary material
Source: publisher site journal article supplement (https://www.spandidos-publications.com/7469/downloadSupplementary)
Supplement: Supplementary file 1 [file downloadSupplementary]

## Sheet: Sheet1
Table SX. Immune, stromal, and estimate scores of gastric cancer patients in the TCGA-STAD cohort estimated by ESTIMATE algorithm.
Sample ID	StromalScore	ImmuneScore	ESTIMATEScore
TCGA.3M.AB46.01	-325.843	-608.66	-934.503
TCGA.3M.AB47.01	928.058	338.252	1266.31
TCGA.B7.5818.01	-178.182	938.734	760.552
TCGA.B7.A5TI.01	347.645	-120.466	227.179
TCGA.B7.A5TJ.01	-519.647	-562.06	-1081.71
TCGA.B7.A5TK.01	935.013	1745.27	2680.28
TCGA.B7.A5TN.01	515.547	-236.562	278.985
TCGA.BR.4187.01	2026.33	1375.87	3402.2
TCGA.BR.4191.01	951.936	1518.34	2470.27
TCGA.BR.4201.01	1345.08	893.374	2238.45
TCGA.BR.4253.01	457.354	2183.28	2640.64
TCGA.BR.4256.01	1625.92	1806.98	3432.9
TCGA.BR.4257.01	761.379	929.405	1690.78
TCGA.BR.4267.01	-227.376	161.424	-65.9512
TCGA.BR.4279.01	2015.78	1333.76	3349.54
TCGA.BR.4280.01	-497.327	382.901	-114.425
TCGA.BR.4294.01	-787.192	-890.393	-1677.59
TCGA.BR.4357.01	593.552	1142.43	1735.98
TCGA.BR.4361.01	928.936	752.684	1681.62
TCGA.BR.4363.01	782.587	830.369	1612.96
TCGA.BR.4366.01	-15.2769	-148.709	-163.986
TCGA.BR.4367.01	1093.6	1021.19	2114.79
TCGA.BR.4368.01	556.284	850.552	1406.84
TCGA.BR.4369.01	244.917	245.138	490.055
TCGA.BR.4370.01	1170.01	975.201	2145.21
TCGA.BR.4371.01	-845.156	-43.4868	-888.643
TCGA.BR.6452.01	71.5543	456.899	528.453
TCGA.BR.6453.01	884.966	2075.28	2960.24
TCGA.BR.6454.01	-85.0862	1132.79	1047.7
TCGA.BR.6455.01	158.911	601.258	760.169
TCGA.BR.6456.01	1064.19	424.644	1488.84
TCGA.BR.6457.01	1455.57	709.253	2164.83
TCGA.BR.6458.01	799.963	949.145	1749.11
TCGA.BR.6563.01	1481.23	1671.08	3152.31
TCGA.BR.6564.01	1231.66	528.66	1760.32
TCGA.BR.6565.01	441.71	648.07	1089.78
TCGA.BR.6566.01	544.078	872.495	1416.57
TCGA.BR.6705.01	1589.72	339.212	1928.94
TCGA.BR.6707.01	30.1017	1040.22	1070.32
TCGA.BR.6709.01	1025.96	1811.36	2837.32
TCGA.BR.6710.01	-353.077	-297.744	-650.821
TCGA.BR.6801.01	136.944	-434.043	-297.099
TCGA.BR.6802.01	-59.1196	884.354	825.235
TCGA.BR.6803.01	1110.81	749.947	1860.76
TCGA.BR.6852.01	626.704	1664.71	2291.42
TCGA.BR.7196.01	1201.24	933.874	2135.12
TCGA.BR.7197.01	-342.511	-928.161	-1270.67
TCGA.BR.7704.01	-3.13347	1320.94	1317.8
TCGA.BR.7707.01	-264.03	181.257	-82.7728
TCGA.BR.7715.01	239.802	-738.097	-498.295
TCGA.BR.7716.01	214.25	1028.68	1242.93
TCGA.BR.7717.01	58.1602	-207.471	-149.311
TCGA.BR.7722.01	-18.705	82.1528	63.4478
TCGA.BR.7723.01	24.0868	91.7546	115.841
TCGA.BR.7851.01	242.399	210.357	452.756
TCGA.BR.7901.01	850.06	379.63	1229.69
TCGA.BR.7957.01	1259.92	-85.2943	1174.62
TCGA.BR.7958.01	635.928	1764.17	2400.1
TCGA.BR.7959.01	1042.02	8.23324	1050.25
TCGA.BR.8058.01	1233.43	1535	2768.43
TCGA.BR.8059.01	631.598	-546.954	84.6442
TCGA.BR.8060.01	753.34	353.596	1106.94
TCGA.BR.8077.01	27.5397	745.23	772.77
TCGA.BR.8080.01	1313.33	859.184	2172.52
TCGA.BR.8081.01	917.838	1518.9	2436.73
TCGA.BR.8284.01	903.681	1186.01	2089.69
TCGA.BR.8286.01	180.441	50.6176	231.058
TCGA.BR.8289.01	214.08	-389.23	-175.149
TCGA.BR.8291.01	1619.4	973.341	2592.74
TCGA.BR.8295.01	-1176.78	-1735.01	-2911.79
TCGA.BR.8296.01	36.7991	1054.39	1091.19
TCGA.BR.8297.01	555.462	-186.748	368.714
TCGA.BR.8361.01	-444.422	333.814	-110.608
TCGA.BR.8364.01	1563.9	690.886	2254.79
TCGA.BR.8365.01	1290.76	468.809	1759.57
TCGA.BR.8366.01	1051.13	1838.63	2889.76
TCGA.BR.8367.01	772.97	-58.1712	714.798
TCGA.BR.8368.01	-927.509	-151.129	-1078.64
TCGA.BR.8369.01	40.5577	-577.031	-536.474
TCGA.BR.8371.01	551.709	570.558	1122.27
TCGA.BR.8372.01	-166.182	946.974	780.792
TCGA.BR.8373.01	469.985	-285.638	184.347
TCGA.BR.8380.01	887.232	-175.683	711.549
TCGA.BR.8381.01	826.584	1516.53	2343.11
TCGA.BR.8382.01	437.363	536.576	973.939
TCGA.BR.8384.01	1354.72	598.517	1953.24
TCGA.BR.8483.01	-722.448	-1000.52	-1722.97
TCGA.BR.8484.01	442.887	998.936	1441.82
TCGA.BR.8485.01	299.136	271.95	571.085
TCGA.BR.8486.01	269.686	465.282	734.968
TCGA.BR.8487.01	-293.268	219.173	-74.0943
TCGA.BR.8588.01	788.575	947.304	1735.88
TCGA.BR.8589.01	-568.291	1397.5	829.211
TCGA.BR.8590.01	1086.18	739.82	1826
TCGA.BR.8591.01	26.2531	265.798	292.051
TCGA.BR.8592.01	1240.43	580.21	1820.64
TCGA.BR.8676.01	-604.684	680.861	76.1775
TCGA.BR.8677.01	1093.85	801.601	1895.45
TCGA.BR.8678.01	-328.272	-745.183	-1073.45
TCGA.BR.8679.01	237.464	-572.562	-335.098
TCGA.BR.8680.01	-1092.15	-1239.42	-2331.57
TCGA.BR.8682.01	827.278	329.766	1157.04
TCGA.BR.8683.01	556.977	-33.128	523.849
TCGA.BR.8686.01	659.226	1214.03	1873.26
TCGA.BR.8687.01	-174.111	-559.369	-733.479
TCGA.BR.8690.01	505.552	1059.95	1565.51
TCGA.BR.A44T.01	780.15	2181.9	2962.05
TCGA.BR.A44U.01	-42.1803	-644.672	-686.853
TCGA.BR.A4CR.01	-1027.93	-1357.29	-2385.22
TCGA.BR.A4CS.01	112.78	-22.993	89.7865
TCGA.BR.A4IV.01	1405.58	-26.7939	1378.79
TCGA.BR.A4J4.01	68.7315	264.525	333.256
TCGA.BR.A4J5.01	1179.97	414.981	1594.95
TCGA.BR.A4J6.01	-129.43	-492.015	-621.445
TCGA.BR.A4J7.01	1103.39	1204.21	2307.6
TCGA.BR.A4J8.01	401.366	-252.19	149.175
TCGA.BR.A4J9.01	739.269	126.011	865.28
TCGA.BR.A4PF.01	-227.295	746.33	519.035
TCGA.BR.A4QL.01	-878.452	-309.98	-1188.43
TCGA.CD.5798.01	1008.58	533.46	1542.04
TCGA.CD.5799.01	-248.374	-443.219	-691.593
TCGA.CD.5800.01	-727.473	-513.558	-1241.03
TCGA.CD.5801.01	-11.8906	1468.1	1456.21
TCGA.CD.5803.01	1527.46	1906.27	3433.73
TCGA.CD.5804.01	618.279	595.122	1213.4
TCGA.CD.5813.01	1684.6	1614.74	3299.34
TCGA.CD.8524.01	481.897	107.153	589.05
TCGA.CD.8525.01	140.882	654.056	794.938
TCGA.CD.8526.01	4.11023	-94.0593	-89.9491
TCGA.CD.8527.01	-525.314	-249.774	-775.088
TCGA.CD.8528.01	-37.7838	-164.335	-202.119
TCGA.CD.8529.01	1054.04	1411.63	2465.68
TCGA.CD.8530.01	1090.18	161.768	1251.94
TCGA.CD.8531.01	289.401	1691.71	1981.12
TCGA.CD.8532.01	336.913	1188.08	1524.99
TCGA.CD.8533.01	-449.4	-1366.39	-1815.79
TCGA.CD.8534.01	-83.3348	71.1617	-12.1731
TCGA.CD.8535.01	-740.575	-1120.53	-1861.11
TCGA.CD.A486.01	91.751	14.0605	105.812
TCGA.CD.A487.01	99.8018	-412.091	-312.289
TCGA.CD.A489.01	695.65	369.465	1065.11
TCGA.CD.A48A.01	-465.208	-236.438	-701.646
TCGA.CD.A48C.01	90.1558	-64.9746	25.1812
TCGA.CD.A4MG.01	349.372	405.253	754.625
TCGA.CD.A4MH.01	-357.606	-309.885	-667.49
TCGA.CG.4301.01	721.019	484.949	1205.97
TCGA.CG.4304.01	683.769	814.403	1498.17
TCGA.CG.4305.01	785.266	1076.86	1862.13
TCGA.CG.4306.01	399.974	590.926	990.9
TCGA.CG.4436.01	-703.346	373.571	-329.775
TCGA.CG.4437.01	459.537	1024.96	1484.5
TCGA.CG.4438.01	7.70599	787.498	795.204
TCGA.CG.4440.01	-716.098	-96.0986	-812.196
TCGA.CG.4441.01	422.466	195.687	618.153
TCGA.CG.4442.01	-327.718	-371.442	-699.16
TCGA.CG.4443.01	-300.803	-947.876	-1248.68
TCGA.CG.4444.01	387.602	538.797	926.399
TCGA.CG.4460.01	-430.653	-408.402	-839.056
TCGA.CG.4462.01	1977.12	1612.4	3589.52
TCGA.CG.4465.01	603.583	703.664	1307.25
TCGA.CG.4466.01	-1029.55	-700.824	-1730.37
TCGA.CG.4469.01	-273.395	374.244	100.849
TCGA.CG.4475.01	761.647	-60.8782	700.769
TCGA.CG.4476.01	1138.22	880.407	2018.62
TCGA.CG.4477.01	381.833	1219.98	1601.82
TCGA.CG.5716.01	-588.748	736.408	147.66
TCGA.CG.5717.01	-183.118	666.834	483.716
TCGA.CG.5718.01	-102.059	637.988	535.929
TCGA.CG.5719.01	1077.15	566.927	1644.08
TCGA.CG.5720.01	369.717	894.874	1264.59
TCGA.CG.5721.01	368.164	1976.67	2344.83
TCGA.CG.5722.01	275.551	1877.11	2152.66
TCGA.CG.5723.01	112.004	1168.97	1280.97
TCGA.CG.5724.01	1.99546	255.984	257.979
TCGA.CG.5725.01	-957.028	-1198.75	-2155.77
TCGA.CG.5726.01	-1251.28	-624.486	-1875.77
TCGA.CG.5732.01	-784.13	804.884	20.754
TCGA.CG.5734.01	205.366	1636.78	1842.15
TCGA.D7.5577.01	14.7198	1320.65	1335.37
TCGA.D7.5578.01	345.748	615.669	961.416
TCGA.D7.6519.01	-498.879	-389.249	-888.129
TCGA.D7.6520.01	374.642	-179.515	195.127
TCGA.D7.6521.01	1003.26	1031.84	2035.1
TCGA.D7.6522.01	1850.17	2457.42	4307.59
TCGA.D7.6524.01	1189.6	832.758	2022.35
TCGA.D7.6525.01	172.733	-98.568	74.1646
TCGA.D7.6526.01	-659.098	-561.187	-1220.29
TCGA.D7.6527.01	-201.881	-173.46	-375.342
TCGA.D7.6528.01	-963.94	-690.916	-1654.86
TCGA.D7.6815.01	27.4033	-356.479	-329.076
TCGA.D7.6818.01	1093.51	798.324	1891.84
TCGA.D7.6822.01	-503.458	-397.271	-900.729
TCGA.D7.8570.01	752.839	1939.69	2692.53
TCGA.D7.8572.01	860.648	426.619	1287.27
TCGA.D7.8573.01	-980.388	-374.446	-1354.83
TCGA.D7.8574.01	1455.44	1996.26	3451.7
TCGA.D7.8575.01	-208.74	684.948	476.208
TCGA.D7.8576.01	-72.4089	-117.686	-190.095
TCGA.D7.8578.01	850.469	61.4603	911.929
TCGA.D7.8579.01	939.168	549.078	1488.25
TCGA.D7.A4YU.01	451.192	1266.33	1717.52
TCGA.D7.A4YX.01	-460.476	580.516	120.04
TCGA.D7.A4Z0.01	473.884	821.532	1295.42
TCGA.D7.A6EV.01	-1043.19	-708.678	-1751.86
TCGA.D7.A6EX.01	-631.71	-1047.61	-1679.32
TCGA.D7.A6EY.01	238.891	1215.8	1454.69
TCGA.D7.A6EZ.01	183.005	963.896	1146.9
TCGA.D7.A6F0.01	-535.245	-46.989	-582.234
TCGA.D7.A6F2.01	-58.4265	473.376	414.95
TCGA.D7.A747.01	794.407	804.592	1599
TCGA.D7.A748.01	1736.82	1556.14	3292.96
TCGA.D7.A74A.01	-1208.01	-220.133	-1428.14
TCGA.EQ.8122.01	90.5786	-459.842	-369.263
TCGA.F1.6177.01	-819.293	-382.663	-1201.96
TCGA.F1.6874.01	215.062	716.928	931.99
TCGA.F1.6875.01	-932.732	-1203.29	-2136.02
TCGA.F1.A448.01	605.214	1005.07	1610.28
TCGA.F1.A72C.01	330.205	227.317	557.522
TCGA.FP.7735.01	-115.86	373.645	257.785
TCGA.FP.7829.01	42.8036	-264.856	-222.052
TCGA.FP.7916.01	898.376	1495.41	2393.79
TCGA.FP.7998.01	1183.27	2123.25	3306.52
TCGA.FP.8099.01	-60.4042	-147.228	-207.632
TCGA.FP.8209.01	1549.49	1690.81	3240.3
TCGA.FP.8210.01	1484.09	1670.25	3154.34
TCGA.FP.8211.01	-951.262	38.5749	-912.687
TCGA.FP.8631.01	-211.933	-664.701	-876.635
TCGA.FP.A4BF.01	1122.09	1793.6	2915.69
TCGA.FP.A8CX.01	-785.702	43.7923	-741.91
TCGA.FP.A9TM.01	-981.345	745.944	-235.401
TCGA.HF.7131.01	-261.447	361.59	100.143
TCGA.HF.7132.01	298.413	1049.07	1347.48
TCGA.HF.7133.01	178.939	781.736	960.675
TCGA.HF.7134.01	-425.29	-1.13796	-426.428
TCGA.HF.A5NB.01	-1097.9	-146.98	-1244.88
TCGA.HJ.7597.01	-978.075	224.377	-753.698
TCGA.HU.8238.01	-183.404	357.2	173.797
TCGA.HU.8244.01	-1760.13	-699.436	-2459.57
TCGA.HU.8249.01	-746.587	90.4642	-656.122
TCGA.HU.8602.01	-39.4848	959.266	919.782
TCGA.HU.8604.01	531.046	1500.79	2031.83
TCGA.HU.8608.01	337.984	1794.19	2132.17
TCGA.HU.8610.01	351.907	1134.14	1486.04
TCGA.HU.A4G2.01	-176.93	72.3359	-104.594
TCGA.HU.A4G3.01	-560.692	-385.352	-946.045
TCGA.HU.A4G8.01	-463.875	257.313	-206.562
TCGA.HU.A4G9.01	-1651.28	-889.751	-2541.03
TCGA.HU.A4GC.01	-210.489	-282.09	-492.578
TCGA.HU.A4GD.01	-1492.17	-877.47	-2369.64
TCGA.HU.A4GF.01	-787.625	-145.758	-933.383
TCGA.HU.A4GH.01	-1707.37	-333.194	-2040.57
TCGA.HU.A4GJ.01	203.01	2495.24	2698.25
TCGA.HU.A4GP.01	-590.13	-316.692	-906.822
TCGA.HU.A4GQ.01	99.7462	-42.4138	57.3323
TCGA.HU.A4GT.01	-771.463	-277.792	-1049.26
TCGA.HU.A4GU.01	-849.241	-463.228	-1312.47
TCGA.HU.A4GX.01	-581.955	733.611	151.656
TCGA.HU.A4GY.01	1553.91	2318.35	3872.26
TCGA.HU.A4H0.01	-651.517	807.055	155.538
TCGA.HU.A4H2.01	-574.884	17.9748	-556.909
TCGA.HU.A4H3.01	-690.321	-226.942	-917.263
TCGA.HU.A4H4.01	-304.362	823.765	519.404
TCGA.HU.A4H5.01	-872.619	-321.808	-1194.43
TCGA.HU.A4H6.01	-178.419	514.361	335.942
TCGA.HU.A4H8.01	-1309.96	-482.422	-1792.38
TCGA.HU.A4HB.01	-260.586	1666.11	1405.52
TCGA.HU.A4HD.01	-358.754	-604.614	-963.369
TCGA.IN.7806.01	-783.488	-594.615	-1378.1
TCGA.IN.7808.01	-73.6442	2257.33	2183.69
TCGA.IN.8462.01	-2.07286	-56.6074	-58.6802
TCGA.IN.8663.01	-811.445	-734.801	-1546.25
TCGA.IN.A6RI.01	-1411.01	-788.142	-2199.15
TCGA.IN.A6RJ.01	-1150.39	-440.897	-1591.29
TCGA.IN.A6RL.01	-675.518	-370.671	-1046.19
TCGA.IN.A6RN.01	-1048.33	-588.369	-1636.7
TCGA.IN.A6RO.01	-1404.14	-659.869	-2064.01
TCGA.IN.A6RR.01	-884.502	-448.443	-1332.95
TCGA.IN.A6RS.01	-566.261	413.243	-153.018
TCGA.IN.A7NR.01	-499.702	217.641	-282.062
TCGA.IN.A7NT.01	-357.458	-513.96	-871.418
TCGA.IN.A7NU.01	74.2287	479.906	554.134
TCGA.IN.AB1V.01	-1325.28	-523.37	-1848.65
TCGA.IN.AB1X.01	-690.744	759.749	69.005
TCGA.IP.7968.01	360.824	44.5837	405.407
TCGA.KB.A6F7.01	-758.433	583.42	-175.013
TCGA.KB.A93G.01	1550.79	788.878	2339.67
TCGA.KB.A93H.01	-1515.56	-550.939	-2066.5
TCGA.KB.A93J.01	-241.613	805.331	563.718
TCGA.MX.A5UG.01	1409.03	1496.17	2905.21
TCGA.MX.A5UJ.01	228.598	-155.069	73.5291
TCGA.MX.A663.01	989.203	-413.853	575.349
TCGA.MX.A666.01	-851.5	-247.261	-1098.76
TCGA.R5.A7O7.01	-178.073	100.459	-77.6143
TCGA.R5.A7ZE.01	-1291.68	-1056.75	-2348.43
TCGA.R5.A7ZF.01	-1258.46	-1002.64	-2261.1
TCGA.R5.A7ZI.01	-294.711	1469.62	1174.91
TCGA.R5.A7ZR.01	-1131.12	-462.524	-1593.65
TCGA.R5.A805.01	610.626	1346.32	1956.94
TCGA.RD.A7BS.01	117.723	584.727	702.45
TCGA.RD.A7BT.01	-1244.04	-329.107	-1573.14
TCGA.RD.A7BW.01	1555.84	1388.97	2944.81
TCGA.RD.A7C1.01	63.6172	1151.47	1215.09
TCGA.RD.A8MV.01	46.9243	1521.25	1568.18
TCGA.RD.A8MW.01	883.487	1198.78	2082.26
TCGA.RD.A8N0.01	836.933	1689.87	2526.8
TCGA.RD.A8N1.01	424.168	1536.45	1960.62
TCGA.RD.A8N2.01	909.111	250.691	1159.8
TCGA.RD.A8N4.01	659.93	292.731	952.661
TCGA.RD.A8N5.01	1291.63	974.118	2265.74
TCGA.RD.A8N6.01	-145.797	-747.798	-893.595
TCGA.RD.A8N9.01	1253.4	648.934	1902.34
TCGA.RD.A8NB.01	409.679	790.739	1200.42
TCGA.SW.A7EA.01	-207.205	97.2799	-109.925
TCGA.SW.A7EB.01	-638.935	100.933	-538.002
TCGA.VQ.A8DT.01	-1200.15	-555.955	-1756.11
TCGA.VQ.A8DU.01	-336.776	-498.536	-835.312
TCGA.VQ.A8DV.01	-1181.47	-1201.01	-2382.48
TCGA.VQ.A8DZ.01	-529.164	-431.033	-960.197
TCGA.VQ.A8E0.01	-885.915	35.3161	-850.599
TCGA.VQ.A8E2.01	236.245	-687.988	-451.743
TCGA.VQ.A8E3.01	-629.248	483.183	-146.065
TCGA.VQ.A8E7.01	-474.855	-668.349	-1143.2
TCGA.VQ.A8P2.01	-1192.22	-939.817	-2132.04
TCGA.VQ.A8P3.01	-92.6458	-380.385	-473.031
TCGA.VQ.A8P5.01	48.9993	-110.574	-61.5751
TCGA.VQ.A8P8.01	93.3572	306.676	400.034
TCGA.VQ.A8PB.01	-310.006	-341.783	-651.788
TCGA.VQ.A8PC.01	149.113	701.941	851.054
TCGA.VQ.A8PD.01	484.636	1345.25	1829.88
TCGA.VQ.A8PE.01	-508.468	-10.6101	-519.078
TCGA.VQ.A8PF.01	643.428	1660.86	2304.29
TCGA.VQ.A8PH.01	-1208.53	-331.006	-1539.53
TCGA.VQ.A8PJ.01	-1104.2	-751.509	-1855.71
TCGA.VQ.A8PK.01	-402.648	-333.744	-736.392
TCGA.VQ.A8PM.01	201.318	749.26	950.578
TCGA.VQ.A8PO.01	-97.8956	751.406	653.511
TCGA.VQ.A8PP.01	-62.4813	104.019	41.5376
TCGA.VQ.A8PQ.01	698.674	2201.23	2899.9
TCGA.VQ.A8PU.01	-1102.09	-660.611	-1762.71
TCGA.VQ.A8PX.01	-1393.89	-165.951	-1559.84
TCGA.VQ.A91A.01	1102.18	377.807	1479.99
TCGA.VQ.A91D.01	-119.553	159.635	40.0826
TCGA.VQ.A91E.01	-1279.47	146.922	-1132.55
TCGA.VQ.A91K.01	-22.0907	346.557	324.467
TCGA.VQ.A91N.01	-1018.18	-606.913	-1625.1
TCGA.VQ.A91Q.01	26.2497	-804.435	-778.185
TCGA.VQ.A91S.01	-536.978	312.286	-224.692
TCGA.VQ.A91U.01	-457.002	321.064	-135.938
TCGA.VQ.A91V.01	-1310.96	-687.408	-1998.36
TCGA.VQ.A91X.01	-1806.59	-1104.74	-2911.33
TCGA.VQ.A91Y.01	915.499	839.548	1755.05
TCGA.VQ.A91Z.01	-1646.3	-1309.52	-2955.82
TCGA.VQ.A922.01	256.001	-824.041	-568.041
TCGA.VQ.A923.01	-0.775724	1398.37	1397.6
TCGA.VQ.A924.01	-181.678	250.438	68.76
TCGA.VQ.A925.01	-891.858	-563.593	-1455.45
TCGA.VQ.A927.01	-222.973	-112.986	-335.959
TCGA.VQ.A928.01	195.713	-544.559	-348.846
TCGA.VQ.A92D.01	-621.983	-962.412	-1584.39
TCGA.VQ.A94O.01	-624.731	-306.454	-931.186
TCGA.VQ.A94P.01	1222.98	420.313	1643.29
TCGA.VQ.A94R.01	485.662	-39.3645	446.297
TCGA.VQ.A94T.01	-794.967	-903.882	-1698.85
TCGA.VQ.A94U.01	200.677	-713.868	-513.191
TCGA.VQ.AA64.01	271.492	-582.772	-311.28
TCGA.VQ.AA68.01	-952.405	-59.879	-1012.28
TCGA.VQ.AA69.01	-1026.04	-87.2023	-1113.24
TCGA.VQ.AA6A.01	-1046.11	-674.066	-1720.18
TCGA.VQ.AA6D.01	-1404.02	-893.337	-2297.35
TCGA.VQ.AA6F.01	-609.432	271.993	-337.439
TCGA.VQ.AA6G.01	-850.297	-468.201	-1318.5
TCGA.VQ.AA6J.01	-0.148125	926.779	926.63
TCGA.VQ.AA6K.01	-204.264	-58.9854	-263.249
TCGA.ZA.A8F6.01	724.016	577.19	1301.21
TCGA.ZQ.A9CR.01	836.023	570.112	1406.14
